# Supplementary material for: Characteristics of wet carbon deposition in a semi-arid catchment at Loess Plateau, China
Source: Copernicus journal article supplement (doi:10.5194/bg-2017-488), 2018-01-11
Supplement: Supplementary file [file bg-2017-488-AC3-supplement.pdf]

# Characteristics of wet dissolved carbon deposition in a semi-arid catchment at the Loess Plateau, China

Linhua Wang<sup>a</sup>, Haw Yen<sup>b</sup>, Liding Chen<sup>a,c</sup>, Xinhui E<sup>a,c</sup>, Yafeng Wang<sup>a,c\*</sup>

<sup>a</sup>State Key Laboratory of Urban and Regional Ecology, Research Center for Eco-Environmental Science, Chinese Academy of Sciences, Beijing 100085, China

<sup>b</sup>Blackland Research and Extension Center, Texas A&M Agrilife Research, Texas A&M University, Texas, 76502, USA

<sup>c</sup> College of Resources and Environment, University of Chinese Academy of Sciences, Beijing 100049, China

\* *Corresponding author*: Yafeng Wang: (yfwang@rcees.ac.cn)

**Abstract.** Wet dissolved carbon deposition is a critical node of the global carbon cycle, but little is known about dissolved organic and inorganic carbon (DOC and DIC) concentrations and fluxes in the semi-arid areas of the Loess Plateau Region (LPR). In this study, we measured variations of DOC and DIC concentration in rainfalls at Yangjuangou Ecological Restoration and Soil and Water Observatory. Rainwater samples were collected in 16 rainfall events from July to September and the event-based, monthly concentrations and fluxes of DOC and DIC were quantified. The results showed that the event-based concentrations and fluxes of DOC and DIC were highly variable, ranging from 0.56 to 28.71 mg C L<sup>-1</sup> and from 3.47 to 17.49 mg C L<sup>-1</sup>, respectively. The corresponding event-based fluxes ranged from 0.21-258.36 mg C m<sup>-2</sup> and from 4.12 to 42.32 mg C m<sup>-2</sup>. The monthly concentrations of DOC and DIC were 24.62 and 4.30 (July), 3.58 and 10.52 (August), 1.01 and 5.89 (September) mg C L<sup>-1</sup>, respectively. Thus, the monthly deposition fluxes of DOC and DIC were 541.64/94.60, 131.03/385.03, and 44.44/259.16 mg C m<sup>-2</sup> for July, August and September, respectively. In addition, the concentrations of DOC and DIC for the concentrated rainy season (July-September) in the studied catchment were 7.06 and 7.00 mg C L<sup>-1</sup>, respectively. The estimated annual wet carbon depositions were 1.91 and 1.89 g C m<sup>-2</sup> yr<sup>-1</sup> for DOC and DIC, respectively. The results of this study suggest the variation in concentrations and fluxes of DOC and DIC and explored that these variation may be related to the dissolved carbon source and the rainfall characteristics during the concentrated rainfall season in the semi-arid catchment of the LPR. Furthermore, these results also suggest that dissolved carbon may be an important external input of carbon into terrestrial ecosystems.

## 1 Introduction

Wet carbon deposition is recognized as the rainfall scavenging of aerosols and gas phase organic compounds, which originated from biogenic and anthropogenic sources (Duarte et al., 2006; Houghton, 2003; May et al., 2013). Dissolved

carbon is a ubiquitous component of rainwater in many regions around the world (Dachs et al., 2005). Global scale model simulations show that DOC concentrations ranging from 1 to 10 mg C L<sup>-1</sup> with a total of 188 Tg C yr<sup>-1</sup> of wet dissolved organic deposition flux occurred during the terrestrial rainfall, which equals approximately to 43% of the total particulate organic carbon transported by rivers to oceans (Galy et al., 2015). A modeling study conducted by Safieddine and Heald (2017) estimated that the total global wet deposition of DOC was 273 Tg C yr<sup>-1</sup>. Similarly, Willey et al. (2000) found that the concentration of DOC in terrestrial precipitation was 1.93 mg C L<sup>-1</sup>, which was greater than nitric and sulfuric acid combined. Thus, the global flux of DOC and DIC via precipitation can be estimated as 430 and 80 Tg C yr<sup>-1</sup> (Willey et al., 2000). Furthermore, as a labile and bioavailable fraction of dissolved carbon, wet deposition of dissolved carbon may provide a substantial input of nutrient source for terrestrial and aquatic ecosystems. For example, Mladenov et al. (2012) used a long-term dataset of weekly DOC deposition and demonstrated that atmospheric wet deposition of dissolved carbon represented a significant source to an alpine catchment in the Rocky Mountains of Colorado, USA. Wang et al. (2017) reported that atmospheric wet deposition might be a large source of DOC in stream water, based on isotopic characteristics of carbon in a semi-arid catchment in the LPR. Consequently, the large magnitude of dissolved carbon flux via rainfall played an important role in ecological processes and acted as one of the key driving forces of the global carbon biogeochemical cycle. Thus, it is urgent to improve the associated knowledge and understanding of dissolved carbon deposition in rainfall.

With regard to relevant studies on nitrogen and phosphorus in atmospheric wet deposition, only a few quantitative studies are available on the atmospheric wet deposition of dissolved carbon. Iavorivska et al. (2016a) summarized that there were only 83 contemporary studies over the last three decades focused on the concentration and flux of dissolved organic carbon via rainfall at a worldwide scale. These available datasets were sparsely measured and only a handful of studies maintained a long-term monitoring. Dissolved carbon deposition concentration and flux in rainfall are not general parameters in monitoring networks, such as the National Atmospheric Deposition Program (USA), European Monitoring Evaluation Program (European Union) and Chinese Ecosystem Research Network (China) (Iavorivska et al., 2016a). In general, only few studies have assessed the dissolved carbon deposition via rainfall, such as the USA (1.1-2.9 mg C L<sup>-1</sup>) (McDowell and Likens, 1998; Quideau and Bockheim, 1997; Willey et al., 2000), Brazil (3.3-4.1 mg C L<sup>-1</sup>) (Coelho et al., 2008), New Zealand (0.1-4.8 mg C L<sup>-1</sup>) (Kieber et al., 2002), Korea (0.2-9.4 mg C L<sup>-1</sup>) (Yan and Kim, 2012), and Poland (4.7-5.1 mg C L<sup>-1</sup>) (Siudek et al., 2015). Until recently, the only measurement data available were those related to wet dissolved carbon deposition in the northern and Tibetan region of China (Li et al., 2016; Pan et al., 2010). Pan et al. (2010) reported that significant seasonal differences in DOC concentrations and deposition fluxes are found in northern China. The corresponding annual average concentration and deposition flux of DOC from the atmosphere ranged from 2.4 to 3.9 mg C L<sup>-1</sup> and from 1.4 to 2.7 g C m<sup>-2</sup> yr<sup>-1</sup>, respectively. Li et al. (2016) also reported that the DOC concentration of seasonal precipitation varied between monsoonal and non-monsoonal periods and the average deposition of DOC was 1.1 mg C L<sup>-1</sup>. The annual deposition flux of DOC was about 0.6 g C m<sup>-2</sup> yr<sup>-1</sup> in Tibetan Plateau of China. These results indicated that wet dissolved carbon concentration and deposition fluxes were commonly found in coastal, forested and alpine regions and showed a spatial and

temporal variation between different regions. The differences were attributed to rainfall, meteorological conditions and were related to the regional source of carbon. In addition, due to the lack of quantitative measurement in dissolved carbon concentration and associated fluxes, including corresponding sources, chemical composition and variation patterns, the carbon exchange between the atmosphere and terrestrial ecosystem have not been incorporated into the current regional or global carbon cycle models (Jurado et al., 2008; Kieber et al., 2002). Thus, wet dissolved carbon deposition in rainfall remains unsolved and highlights the need to acquire more information.

Previous studies have provided insights on the magnitude and importance of wet dissolved carbon deposition in rainwater worldwide. However, studies that have explored atmospheric wet deposition of dissolved carbon are rarely found in the target research area, which is a semi arid catchment in the LPR. The LPR (N 35-41°, E 102-114°), which has an area of  $6.4 \times 10^5$  km<sup>2</sup>, is situated in the middle stream of the Yellow River. The plateau is covered by an average thickness of 100 m of loess. Loess is formed by the accumulation of wind-blown silt (Ding et al., 2002). Meanwhile, the fine-grained particles may serve as nuclei to form a rain droplet or cloud condensation. Consequently, it is worth noting that atmospheric dust scavenged by rainfall may be another source of dissolved carbon, which might differ from other regions. Thus, attention should be paid to the wet deposition processes of DOC and DIC, which were a potential external input of carbon to the semi-arid catchment in the LPR. Until this point, knowledge of wet dissolved carbon deposition and the associated flux has not been fully explored in the LPR. Thus, it is necessary to investigate the DOC and DIC deposition via rainfall, where little information is available.

In this study, we measured DOC and DIC concentrations in samples collected during 16 rainfall events from July to September in the Yangjuangou catchment, which is a semi arid-catchment of LPR. Therefore, the primary goal of this study is to investigate the variations of DOC and DIC fluxes from the atmosphere to understand the magnitude of dissolved carbon deposition during the concentrated rainfall season in LPR. Specifically, the three objectives of this study were to examine the concentration of DOC and DIC and the associated variations in a rainfall event or monthly periods, to quantify the deposition fluxes of DOC and DIC, and to explore the relationships between dissolved carbon, rainfall properties and rainwater chemical characteristics. These results will provide evidence of wet dissolved carbon deposition, which may be important for understanding the carbon cycle and ecosystem response in a semi-arid catchment in the LPR.

## **2 Materials and Methods**

### **2.1 Description of the sampling site**

As shown in Figure 1, the field sampling was performed in the Yangjuangou catchment (N 36° 42', E 109° 31'), which is an Ecological Restoration and Soil and Water Conservation Monitoring Station on the Loess Plateau located in

90 Yan'an, Shaanxi Province. This catchment covers an area of 2.02 km<sup>2</sup> in area and is characterized by a typical loess hilly and  
gully topography with a gully density of 2.74 km/km<sup>2</sup> (Wang et al., 2011). The main land use types in this catchment are  
forest, shrub, grassland, orchard and farmland. The major forest species are *Robinia pseudoacacia*, *Salix spp.* and *Populus*  
95 *spp.* The *Artemisa argyi*, *Stipa Bungeana trin.*, *Bothriochloa ischaemum*, *Lespedezadavurica schindl.*, and *Artemisia*  
*sacrorum* are classified as grassland. The major orchards are *Prunus armeniaca L.*, *Malus pumila Mill.*, and *Juglans regia L.*  
The major crops are *Setaria italica*, *Zea may L.* *Glycinemax (L) Merr.* *Panicum miliaceum L.* and *Solanum tuberosum* (Fu et  
al., 2014). The catchment has a semi-arid continental monsoonal climate and annual mean minimum and maximum  
temperatures of 6.5°C (January) and 22.9°C (July). The mean annual rainfall amount is 535 mm, whereas the concentrated  
rainfall occurs from June to September with large interannual fluctuations. A meteorological station is used to monitor the  
rainfall amounts, air temperature, moisture, wind velocity, etc. The soil in this area is classified as a typical loess with a fine  
100 silt texture and is weakly resistant to detached by raindrops or runoff. The average erosion rate was 7715.5 t km<sup>-2</sup> yr<sup>-1</sup>  
between 2006 and 2009 (Fu et al., 2014).

## 2.2 Collection of rainfall samples

In the Yangjuangou catchment, the experimenters resided in the field observatory station and treated the samples  
immediately after a rainfall event to ensure the dissolved carbon in the rainwater did no microbiologically biodegrade.  
105 Because the common sampling frequency is monthly or weekly at this field observatory station, this sampling method may  
result in dissolved carbon in rainwater that is degraded by microbial activities (Kieber et al., 2002; Willey et al., 2000). This  
is also the reason for the measurement scarcity of wet dissolved carbon deposition concentrations and fluxes in the existing  
ecosystem monitoring networks worldwide. In this study, rainfall samples were collected from July to September 2015. The  
use of an open-to-the-atmosphere collector is a common approach for collecting atmospheric wet deposition during an  
110 individual rainfall event. A rain gauge was installed on the roof of the building at the sampling site to determine the rainfall  
amount and can be used for collecting rainfall samples during a rainfall event. Two additional duplicate rainfall samples were  
collected using a steel bucket (d=29 cm). During the field collection, the rainwater samples were poured into high-density  
polyethylene bottles at the end of a rainfall event. All rainfall containers were cleaned with deionized water after a collection  
and returned to the sampling sites for the next rainfall sampling. Information on the rainfall events that occurred and were  
115 sampled during the study period is summarized in Table 1 and Figure 2. There were 37 rainfall events in total and a total  
rainfall amount of 102.4 mm over the sampling period of July to September, of which the individual rainfall amount varied  
from 0.2 mm to 13.6 mm. The rainfall event collections in July, August, September were 4, 7, and 5, respectively, whereas  
the corresponding total rainfall events were 6, 12, and 7 in each month. Therefore, we sampled 15.8, 22.4 and 32.9 mm of  
rainfall that occurred in each month, respectively. The sampled rainfall accounted for 69.4% of the total amount of rainfall  
120 over the sampling period. Some events were not sampled due to the experimenter transporting the samples to the State Key

Laboratory of Urban and Regional Ecology in Beijing for indoor analysis, and thus, there is no experimenter was at the field station during those events.

### 2.3 In situ and laboratory measurements

In this study, there are three steps for conducting in situ and laboratory measurements. First, the TDS (total dissolved solids) and pH of unfiltered rainfall samples were immediately tested using a portable Ultrameter 6PFC (MYRON L. Company, USA) after each rainfall collection. Then, each sample was filtered by a 0.45  $\mu\text{m}$  membrane filter (Whatman, GE, USA) and stored in high-density polyethylene bottles. Before use, the bottles were strictly cleaned with a 10% hydrochloric acid solution, and then, these bottles were soaked in deionized water and air-dried. The bottles filled with 200 ml filtrates were stored in a freezer (4°C). After completing the rainwater filtration, all filtered membranes were soaked in 80°C deionized water and maintained at this temperature for 12 h to clean and air-dry for the next use. Third, the samples were transported to the laboratory for further analysis. Total dissolved carbon (TDC) and DIC concentrations were determined by Vario (Elementar, Germany), which included a high-temperature combustion furnace, self-contained acidification module and a highly sensitive CO<sub>2</sub> detector. Prior to measurement, the instrument should dose 125 ml of 1% H<sub>3</sub>PO<sub>4</sub> solution (phosphoric acid) in the acidification module, and then, validation is conducted by analyzing various concentrations of a TDC standard solution to achieve accurate results. TDC is automatically measured by the combustion of a sample, whereas DIC is measured after acidification of a sample. The distilled water blanks were also tested every 50 samples for ensuring the quality of results. TDC is recognized as the sum of the DIC and DOC components, and thus, the DOC was the difference between TDC and DIC for each sample (DOC=TDC-DIC). Meanwhile, NO<sub>3</sub><sup>-</sup> and NH<sub>4</sub><sup>+</sup> were measured on the FUTURA Segmented Continuous Flow Analysis system (Alliance, France).

### 2.4 Data processing

In the present study, the DIC and DOC concentrations in the rainfall for an event-based, monthly period underwent volume-weighted mean (VWM) concentration calculations, which are commonly used in wet dissolved carbon deposition studies for minimizing the average effects of a small rainfall amount (Li et al., 2017; Pan et al., 2010; Santos et al., 2011; Santos et al., 2014). The calculation of the VWM concentration and wet deposition flux were defined in the following equations:

$$VWM = \frac{\sum_{i=1}^n C_i \times P_i}{\sum_{i=1}^n P_i}$$

$$F = VWM \times \sum_{i=1}^m P_i$$

where  $P_i$  (mm) is the rainfall amount corresponding to each sample;  $C_i$  ( $\text{mg C L}^{-1}$ ) is the DOC and DIC concentrations in an individual rainfall sample;  $n$  and  $m$  are the number of samples and total rainfall events in a time period;  $F$  ( $\text{mg C m}^{-2}$ ) is the wet deposition flux of DOC and DIC during a month or rainy season in the study region; and  $S$  ( $\text{m}^2$ ) is the catchment area. To analyze their potential relationships among DIC, DOC,  $\text{NH}_4^+\text{-N}$ ,  $\text{NO}_3^-\text{-N}$ , TDS, and pH, Pearson's test ( $P < 0.05$ ) was performed using SPSS (Statistics Package for Social Science) (IBM, 2010). The corresponding figures were developed using Sigma Plot 10.0 (Systat, 2008).

### 3 Results and Discussion

#### 3.1 Concentrations and fluxes of DOC and DIC

As illustrated in Figure 2-a, we analyzed 48 rainfall samples from 16 rainfall events, which spanned a range of rainfall amounts during the concentrated rainfall season, and we quantified the variability in concentrations and fluxes of DOC and DIC for an event-based or monthly rainfall. The event-based concentration of DOC exhibited large variations and ranged from 0.56 to 28.71  $\text{mg C L}^{-1}$ , whereas the maximum and minimum concentrations were found in July and September. For each month during the sampling period, the ranges of DOC concentrations were 15.14-28.71, 0.73-6.75, and 0.56-1.86  $\text{mg C L}^{-1}$ , whereas the monthly concentrations of DOC were 24.62, 3.58, and 1.01  $\text{mg C L}^{-1}$  for July, August and September, respectively (Table 2). In addition, DIC concentrations generally varied from 0.5 to 13.6  $\text{mg C L}^{-1}$  from July to September. DIC concentrations in each monthly rainfall were 3.47-6.86 (July), 6.77-17.49 (August), 4.99-10.35 (September)  $\text{mg C L}^{-1}$ , while monthly wet DIC deposition concentrations were 4.30, 10.52, and 5.89  $\text{mg C L}^{-1}$ , respectively (Table 2). Based on the DOC and DIC concentrations and rainfall amounts over the sampling period of July to September, concentrations of DOC and DIC during this concentrated rainfall season were 7.06 and 7.00  $\text{mg C L}^{-1}$ . DOC concentrations exhibited substantial variations with much higher concentrations than DIC in July, and then, the DOC decreased to a lower concentration than DIC in August and September. The variation in the dissolved carbon concentration of the rainwater could be attributed to the differences of rainfall amount and frequency, carbon sources, and meteorological conditions (Iavorivska et al., 2017a; Iavorivska et al., 2017b; Iavorivska et al., 2016b). As shown in Figure 3-a&b, the concentration of DOC and DIC in the rainwater generally decreased with a single rainfall amount. Similar relationships between the dissolved carbon concentration and rainfall amount have also been found at other sites (Heartsill-Scalley et al., 2007; Pantelaki et al., 2018; Santos et al., 2013). However, DOC concentrations can be high or less associated with a smaller rainfall amount during a single event (Figure 3-a&b). These findings suggested that the concentration of DOC was not followed a dilution behavior. Elevated DOC concentrations were observed in July, which could be attributed to aerosols emitted from biogenic and anthropogenic activities and dust particles (Kieber et al., 2002; Mladenov et al., 2012). In addition, the frequency of rainfall events is lower and shows a flush effect. For example, when the rainfall event occurred on July 17, it had been 10 days since last rainfall,

suggesting that DOC tends to be effectively flushed from the atmosphere with a large rainfall amount. However, the decreased DOC concentrations in August and September may be attributed to a reduced aerosol source (Witkowska and Lewandowska, 2016). Moreover, the frequency of rainfall events was increased, and the rainfall intervals ranged between 0 and 5 days, and thus, this may lead to a reduction in the DOC concentration (Figure 2-a).

180 The wet dissolved carbon deposition flux in an individual rainfall event and the proportion of DOC and DIC were also observed during the sampled period (Figure 2-b). In general, DOC deposition flux for a single rainfall event ranged from 0.21 to 258.36 mg C m<sup>-2</sup>, while the monthly deposition fluxes of DOC were 541.64 (July), 131.03 (August), and 44.44 (September) mg C m<sup>-2</sup>, respectively (Table 2). In contrast to DOC, the DIC deposition flux ranged from 3.10 to 89.81 mg C m<sup>-2</sup>, with a lower DIC deposition flux found in July (4.12-42.32 mg C m<sup>-2</sup>) and then an increase in August (2.6-67.66 mg C m<sup>-2</sup>) and September (3.10-89.81 mg C m<sup>-2</sup>). Meanwhile, the DIC deposition fluxes for each month were 94.60, 385.03, and 259.16 mg C m<sup>-2</sup>, respectively (Table 2). In addition, the DOC was the primary contributor to the wet dissolved carbon flux, with a proportion that ranged from 79 to 86%, with an average of 83% in July. Then, the proportion of DOC contribution decreased in August and September, which ranged from 8 to 42%, with an average of 17%. There were differences in the deposition of a single rainfall event due to both the dissolved carbon concentration and rainfall amount. A higher DOC  
190 deposition flux was found in July with a significantly higher DOC concentration, especially the rainfall that occurred on July 19. However, there is a reduced DOC deposition flux, even with higher DOC concentration associated with a lesser rainfall amount, such as the single rainfall events on July 29 and 31. These results indicated the lesser rainfall amounts may overwhelm the effects of a high DOC concentration. Meanwhile, the DIC deposition flux appeared in accordance with variations in the associated rainfall amount for each month. Thus, the DOC concentrations in rainfall may have a major  
195 impact on the DOC deposition flux, which is supported by the results shown in Figure 3-c & d. These results show that the different variations in DOC and DIC occur during sequential rainfall events in the concentrated rainfall season in the LPR.

### 3.2 Correlation analysis

Correlations between DOC/DIC concentrations and NH<sub>4</sub><sup>+</sup>-N, NO<sub>3</sub><sup>-</sup>-N, TDS, and pH in rainwater samples are shown in Table 3. The concentrations of NH<sub>4</sub><sup>+</sup>-N, NO<sub>3</sub><sup>-</sup>-N, TDS and pH in terms of regression functions of DOC and DIC during  
200 rainfall are presented in Figure 4. For DOC, a significant positive correlation between DOC concentration and NO<sub>3</sub><sup>-</sup>-N and TDS were obtained with correlation coefficients of 0.76 and 0.57 (P<0.01), whereas a negative correlation was found between the DOC concentration and NH<sub>4</sub><sup>+</sup>-N with a correlation coefficient of -0.67 (P<0.01). A positive correlation was found between the DOC concentration and NO<sub>3</sub><sup>-</sup>-N, which was an indicator of fossil fuel burning, as also stated by Santos et al. (2014) and Willey et al. (2000). In addition, the observed TDS varied within an extensive range of 10.70-253.70 mg L<sup>-1</sup>,  
205 and the average value was 73.10 mg L<sup>-1</sup> for all rainfall events occurred during study period (Table 2). The average TDS in July, August and September were 131.22, 74.01, and 25.33 mg L<sup>-1</sup>, which coincided with variations in DOC concentrations

each month. The TDS in the rainfall in the study region was much higher than other regions of China. As reported by Hao et al. (2017) in the Xiangxi River catchment in eastern China, TDS ranged from 40.63 to 70.71 mg L<sup>-1</sup>, with an average of 55.26 mg L<sup>-1</sup> of rainfall. Meanwhile, DOC was also positively correlated with TDS and indicated that dissolved solids emitted from fossil fuel burning or dust particles probably contributed to the dissolved organic carbon in rainwater (Figure 4-b). Therefore, the presence of a higher TDS may explain the higher DOC concentrations in the rainwater. Furthermore, a negative correlation between DOC and NH<sub>4</sub><sup>+</sup>-N concentrations indicated that a lower concentration of NH<sub>4</sub><sup>+</sup>-N and pH with a higher DOC were found in July (Figure 4-c). This result disagreed with the conclusions made by Santos et al. (2014) and Santos et al. (2011), who obtained positive correlations between DOC and NH<sub>4</sub><sup>+</sup>-N. Dissolved NH<sub>4</sub><sup>+</sup> was likely related to dust particles that originated from agriculture and may have contributed to acid neutralization (Lohse et al., 2008). Santos et al. (2014) concluded that the acidity of deposition depends on the concentration of acid-forming ions and alkaline species. Therefore, higher DOC concentrations in rainfall may diminish the dissolved NH<sub>4</sub><sup>+</sup>, and thus, there are lower NH<sub>4</sub><sup>+</sup>-N concentrations and pH in the rainfall. Nevertheless, the lower DOC concentration may lead to more NH<sub>4</sub><sup>+</sup>-N, which may neutralize the acidity, and consequently, the concentrations of NH<sub>4</sub><sup>+</sup>-N and the pH will be higher. In addition, a significant positive correlation between DIC concentration and NH<sub>4</sub><sup>+</sup>-N and pH were found, with correlation coefficients of 0.69 and 0.62 (P<0.01), respectively (Figure 4-d & e). DIC existed as a form of disassociated carbonic acid in the rainfall (Iavorivska et al., 2016a). NH<sub>4</sub><sup>+</sup>-N in the rainfall formed ammonia or ammonium nitrate, which may be neutralize the carbonic acid. Thus, this may result in a higher DIC concentration with a higher NH<sub>4</sub><sup>+</sup>-N concentration and pH. Therefore, these results of the rainwater chemical properties may provide further support for the variations in DOC and DIC during the sampling period.

### 3.3 Comparisons of wet dissolved carbon deposition with other sites

Owing to various sources, meteorological conditions, seasons and sampling times in different regions, the DOC and DIC of the rainfall exhibited spatial and temporal variations. Investigations on the DOC and DIC deposition via rainfall have not been previously conducted in the LPR. Moreover, to our knowledge, two similar observations were performed for other sites in northern and Tibetan of China (Li et al., 2016; Pan et al., 2010). In this study, the DOC concentrations ranged from 1.01 to 24.62 mg C L<sup>-1</sup> over the sampling period of July to September. Meanwhile, DOC concentrations in the rainy season (from July to September) were 7.06 mg C L<sup>-1</sup>, which suggested a higher wet deposition of dissolved organic carbon in the LPR. DOC concentrations measured in the rainfall in the LPR were much higher than those from Beijing (3.90 mg C L<sup>-1</sup>) (Pan et al., 2010) and Lhasa (1.10 mg C L<sup>-1</sup>) (Li et al., 2017). The carbonaceous aerosol particles and soluble organic gases in the atmosphere may have a major impact on the DOC concentrations of the rainfall. As shown in Figure 2, the DOC deposition fluxes were the predominant proportion and had higher concentrations in July. This might be explained by a higher contribution of anthropological emissions. A higher relative proportion of DOC deposition fluxes with a positive correlation observed between DOC and NO<sub>3</sub><sup>-</sup>-N concentrations may highlight a higher contribution of aerosols from



anthropological activities, which was also reported by Santos et al. (2011). Furthermore, the  $\text{NO}_3^-$ -N dissolved in rainwater that formed acidic conditions may reduce the disassociated carbonic acid, which shown lesser DIC concentration for the July rainfall events. Indeed, Santos et al. (2014) suggested that the acid neutralization was likely due to the presence of  $\text{NH}_4^+$ -N, which was beneficial for forming disassociated carbonic acid in the rainwater. This might be another aspect that is further supported by the positive relationship between DIC concentrations and pH and  $\text{NH}_4^+$ -N concentrations, which is showed in Figure 4-d & 4-e. Regarding the dissolved carbon source, rainfall characteristics, meteorological conditions and the interactions between ions in rainwater, the wet dissolved carbon deposition concentrations were varied with different rainfall events in the LPR.

Figure 2 shows the wet dissolved carbon concentration and deposition flux in July, August, and September. Therefore, it was estimated that the annual wet deposition of DOC and DIC were  $1.91$  and  $1.89 \text{ g C m}^{-2} \text{ yr}^{-1}$ , which were much higher than that of other reported regions in China. For instance, the annual wet deposition flux of DOC and DIC was  $1.9$  and  $0.7 \text{ g C m}^{-2} \text{ yr}^{-1}$  in northern China (Pan et al., 2010), and the observed DOC flux was  $0.63 \text{ g C m}^{-2} \text{ yr}^{-1}$  in the Tibetan Plateau (Li et al., 2016). With regard to worldwide sites, the estimated values in the present study were much lower than those reported in Brazil (Ribeirao Preto- $4.8 \text{ g C m}^{-2} \text{ yr}^{-1}$ , Araraquara- $5.4 \text{ g C m}^{-2} \text{ yr}^{-1}$ ) (Coelho et al., 2008), USA (North Carolina- $2.9 \text{ g C m}^{-2} \text{ yr}^{-1}$ ) (Willey et al., 2000). Moreover, the values were comparable to the annual wet deposition flux of DOC in Seoul, South Korea ( $1.90 \text{ g C m}^{-2} \text{ yr}^{-1}$ ), which mostly originated from emissions of fossil fuel combustion (Yan and Kim, 2012). In addition, the magnitude contributions of DOC and DIC to wet dissolved carbon deposition were approximately equal. These results at this study site were within the range reported for other sites (Fahey et al., 2005; Liu et al., 2010) and was also comparable with values measured on Pennsylvania, USA, which reported that contributions of DOC and DIC were 53% and 47% , respectively (Iavorivska et al., 2017a). Therefore, atmospheric wet dissolved carbon deposition in the semi-arid catchment of the LPR may have considerable differences among domestic or worldwide regions. Even though the annual wet deposition flux of dissolved carbon was estimated and may have uncertainty due to limited samples, the flux value reflected the dissolved carbon deposition in the rainfall during the concentrated rainfall season and highlighted that the wet dissolved carbon deposition may be a substantial external input of carbon to a semi-arid catchment in the LPR. Hence, further investigations should be long-term undertaking to evaluate the concentration and flux of dissolved carbon deposition and its impact on terrestrial ecosystems in semi-arid regions.

#### 4 Conclusions

In this study, we measured the concentration of DOC and DIC in rainwater collected in 16 rainfall events during the sampling period of July to September in the Yangjuangou catchment of the LPR. Thus, we also compared the event-based, monthly deposition fluxes of DOC and DIC, and estimated the annual deposition flux using a case study for a semi-arid

catchment. The monthly concentrations of DOC in rainfalls of July, August, and September were 24.62, 3.58, and 1.01 mg C L<sup>-1</sup>, respectively. However, the concentrations of DIC were 4.30, 10.52, and 5.89 mg C L<sup>-1</sup>, respectively. Moreover, the monthly deposition fluxes of DOC and DIC were 541.64/94.60, 131.03/385.03, and 44.44/259.16 mg C m<sup>-2</sup> for July, August and September, respectively. In addition, concentrations of DOC and DIC for the concentrated rainfall season (July-September) in the studied catchment were 7.06 and 7.00 mg C L<sup>-1</sup>. The estimated annual wet dissolved carbon deposition was 1.91 and 1.89 g C m<sup>-2</sup> yr<sup>-1</sup> for DOC and DIC. The event-based and monthly concentrations and fluxes of DOC and DIC were highly variable, which was possibly because of aerosol source, rainfall characteristics and meteorological conditions reported by studies of other sites. Although this is the first study to provide information on the concentration and flux of dissolved carbon deposition during the concentrated rainfall season in a semi-arid catchment, further investigation should be conducted over long-term temporal and large spatial scales to reveal the dissolved carbon input to a watershed and its ecological impacts on terrestrial and aquatic systems. Nevertheless, our primary results provide evidence that wet dissolved carbon deposition represents a substantial carbon contribution to a catchment in the semi-arid area of the LPR.

## Acknowledgments

This work was financially supported by the National Nature Science Foundation of China (41571130083 and 41390464), the State Key Laboratory of Urban and Regional Ecology Open Fund, the Research Center (SKLURE2015-2-2) for Eco-Environmental Sciences, the Chinese Academy of Sciences (CAS), and the Youth Innovation Promotion Association, CAS.

## References

- Coelho, C.H., Francisco, J.G., Nogueira, R.F.P., Campos, M.L.A.M., 2008. Dissolved organic carbon in rainwater from areas heavily impacted by sugar cane burning. *Atmospheric Environment* 42, 7115-7121.
- Dachs, J., Calleja, M.L., Duarte, C.M., del Vento, S., Turpin, B., Polidori, A., Herndl, G.J., Agustí, S., 2005. High atmosphere-ocean exchange of organic carbon in the NE subtropical Atlantic. *Geophysical Research Letters* 32. L21807.
- Ding, Z.L., Ranov, V., Yang, S.L., Finaev, A., Han, J.M., Wang, G.A., 2002. The loess record in southern Tajikistan and correlation with Chinese loess. *Earth and Planetary Science Letters* 200, 387-400.
- Duarte, C.M., Dachs, J., Llabrés, M., Alonso-Laita, P., Gasol, J.M., Tovar-Sánchez, A., Sañudo-Wilhelmy, S., Agustí, S., 2006. Aerosol inputs enhance new production in the subtropical northeast Atlantic. *Journal of Geophysical Research: Biogeosciences* 111. G04006.
- Fahey, T.J., Siccama, T.G., Driscoll, C.T., Likens, G.E., Campbell, J., Johnson, C.E., Battles, J.J., Aber, J.D., Cole, J.J., Fisk, M.C., Groffman, P.M., Hamburg, S.P., Holmes, R.T., Schwarz, P.A., Yanai, R.D., 2005. The Biogeochemistry of Carbon at Hubbard Brook. *Biogeochemistry* 75, 109-176.
- Fu, B., Zhao, W., Zhao, Q., Liu, Y., 2014. Changes of landscape pattern and soil erosion in Loess Plateau. Science Press. Beijing p:186-199 (in Chinese with English abstract).
- Galy, V., Peucker-Ehrenbrink, B., Eglinton, T., 2015. Global carbon export from the terrestrial biosphere controlled by erosion. *Nature* 521(7551):204-207.

- Hao, Z., Gao, Y., Yang, T., Tian, J., 2017. Atmospheric wet deposition of nitrogen in a subtropical watershed in China: characteristics of and impacts on surface water quality. *Environmental science and pollution research international* 24, 8489-8503.
- 305 Heartsill-Scalley, T., Scatena, F.N., Estrada, C., McDowell, W.H., Lugo, A.E., 2007. Disturbance and long-term patterns of rainfall and throughfall nutrient fluxes in a subtropical wet forest in Puerto Rico. *Journal of Hydrology* 333, 472-485.
- Houghton, R.A., 2003. Why are estimates of the terrestrial carbon balance so different? *Global Change Biology* 9:500-509.
- Iavorivska, L., Boyer, E., Grimm, J., 2017a. Wet atmospheric deposition of organic carbon: An underreported source of carbon to watersheds in the northeastern United States. *Journal of Geophysical Research: Atmospheres* 122(5):3104-3115.
- 310 Iavorivska, L., Boyer, E.W., DeWalle, D.R., 2016a. Atmospheric deposition of organic carbon via precipitation. *Atmospheric Environment* 146, 153-163.
- Iavorivska, L., Boyer, E.W., Grimm, J.W., Miller, M.P., DeWalle, D.R., Davis, K.J., Kaye, M.W., 2017b. Variability of dissolved organic carbon in precipitation during storms at the Shale Hills Critical Zone Observatory. *Hydrological Processes* 31, 2935-2950.
- 315 Iavorivska, L., Boyer, E.W., Miller, M.P., Brown, M.G., Vasilopoulos, T., Fuentes, J.D., Duffy, C.J., 2016b. Atmospheric inputs of organic matter to a forested watershed: Variations from storm to storm over the seasons. *Atmospheric Environment* 147, 284-295.
- IBM, C., 2010. IBM SPSS Statistics for Windows, Version 19.0, IBM Corporation, Armonk, NY.
- Jurado, E., Dachs, J., Duarte, C.M., Simó, R., 2008. Atmospheric deposition of organic and black carbon to the global oceans. *Atmospheric Environment* 42, 7931-7939.
- 320 Kieber, R., Peake, B., Willey, J., Avery, B., 2002. Dissolved organic carbon and organic acids in coastal New Zealand rainwater. *Atmospheric Environment* 36, 3557-3563.
- Li, C., Yan, F., Kang, S., Chen, P., Hu, Z., Han, X., Zhang, G., Gao, S., Qu, B., Sillanpaa, M., 2017. Deposition and light absorption characteristics of precipitation dissolved organic carbon (DOC) at three remote stations in the Himalayas and Tibetan Plateau, China. *The Science of the Total Environment* 605-606, 1039-1046.
- 325 Li, C., Yan, F., Kang, S., Chen, P., Qu, B., Hu, Z., Sillanpaa, M., 2016. Concentration, sources, and flux of dissolved organic carbon of precipitation at Lhasa city, the Tibetan Plateau. *Environmental Science and Pollution Research International* 23, 12915-12921.
- Liu, Z., Dreybrodt, W., Wang, H., 2010. A new direction in effective accounting for the atmospheric CO<sub>2</sub> budget: Considering the combined action of carbonate dissolution, the global water cycle and photosynthetic uptake of DIC by aquatic organisms. *Earth-Science Reviews* 99, 162-172.
- 330 Lohse, K.A., Hope, D., Sponseller, R., Allen, J.O., Grimm, N.B., 2008. Atmospheric deposition of carbon and nutrients across an arid metropolitan area. *The Science of the Total Environment* 402, 95-105.
- May, B., Wagenbach, D., Hoffmann, H., Legrand, M., Prenunkert, S., Steier, P., 2013. Constraints on the major sources of dissolved organic carbon in Alpine ice cores from radiocarbon analysis over the bomb-peak period. *Journal of Geophysical Research: Atmospheres* 118: 3319-3327.
- 335 McDowell, W., Likens, G., 1998. Origin, composition, and flux of dissolved organic carbon in the Hubbard Brook valley. *Ecological Monographs* 58(3):177-195.
- Mladenov, N., Williams, M.W., Schmidt, S.K., Cawley, K., 2012. Atmospheric deposition as a source of carbon and nutrients to an alpine catchment of the Colorado Rocky Mountains. *Biogeosciences* 9, 3337-3355.
- 340 Pan, Y., Wang, Y., Xin, J., Tang, G., Song, T., Wang, Y., Li, X., Wu, F., 2010. Study on dissolved organic carbon in precipitation in Northern China. *Atmospheric Environment* 44, 2350-2357.
- Pantelaki, I., Papatzelou, A., Balla, D., Papageorgiou, A., Voutsas, D., 2018. Characterization of dissolved organic carbon in rainwater of an urban/coastal site in Mediterranean area. *Science of The Total Environment* 627, 1433-1441.
- 345 Quideau, S.A., Bockheim, J.G., 1997. Biogeochemical cycling following planting to red pine on a sandy prairie soil. *Journal of Environment Quality* 26(4):1167-1175.
- Safieddine, S.A., Heald, C.L., 2017. A global assessment of dissolved organic carbon in precipitation. *Geophysical Research Letters* 44, 6167-6168.

- 350 Santos, P.S., Otero, M., Santos, E.B., Duarte, A.C., 2011. Chemical composition of rainwater at a coastal town on the southwest of Europe: what changes in 20 years? *The Science of the total environment* 409, 3548-3553.
- Santos, P.S., Santos, E.B., Duarte, A.C., 2013. Seasonal and air mass trajectory effects on dissolved organic matter of bulk deposition at a coastal town in south-western Europe. *Environmental Science and Pollution Research International* 20, 227-237.
- 355 Santos, P.S., Santos, E.B., Duarte, A.C., 2014. Dissolved organic and inorganic matter in bulk deposition of a coastal urban area: an integrated approach. *Journal of Environmental Management* 145, 71-78.
- Siudek, P., Frankowski, M., Siepak, J., 2015. Seasonal variations of dissolved organic carbon in precipitation over urban and forest sites in central Poland. *Environmental Science and Pollution Research International* 22, 11087-11096.
- Systat, 2008. Sigma Plot. Version 10.0, Systat Software Inc., San Jose, CA.
- 360 Wang, Y., Fu, B., Lü, Y., Chen, L., 2011. Effects of vegetation restoration on soil organic carbon sequestration at multiple scales in semi-arid Loess Plateau, China. *Catena* 85, 58-66.
- Wang, Y., Chen, L., Gao Y., Chen S., Chen W., Hao Zh., Jia J., Han N. 2017. Geochemical isotopic composition in the Loess Plateau and corresponding sources analyses: A case study of China's Yangjuangou catchment. *The Science of the Total Environment*.581-582:794-800.
- 365 Willey, J., Kieber, R., Eyman, M., Avery, G.B., 2000. Rainwater dissolved organic carbon: concentrations and global flux. *Global Biogeochemical Cycles* 14(1):139-148.
- Witkowska, A., Lewandowska, A.U., 2016. Water soluble organic carbon in aerosols (PM1, PM2.5, PM10) and various precipitation forms (rain, snow, mixed) over the southern Baltic Sea station. *The Science of the total environment* 573, 337-346.
- 370 Yan, G., Kim, G., 2012. Dissolved organic carbon in the precipitation of Seoul, Korea: Implications for global wet depositional flux of fossil-fuel derived organic carbon. *Atmospheric Environment* 59, 117-124.

375

380

**Table 1.** Characterization of rainwater chemistry from the rainfall events that occurred during the sampling period of July to September.

| Sample date | NH <sub>4</sub> <sup>+</sup> -N<br>(mg L <sup>-1</sup> ) | NO <sub>3</sub> <sup>-</sup> -N<br>(mg L <sup>-1</sup> ) | TDS<br>(mg L <sup>-1</sup> ) | pH   | Rainfall<br>(mm) | Rainfall<br>interval<br>days (d) |
|-------------|----------------------------------------------------------|----------------------------------------------------------|------------------------------|------|------------------|----------------------------------|
| Jul.-17     | 0.04                                                     | 3.24                                                     | 103.37                       | 6.34 | 3.80             | 10                               |
| Jul.-19     | 0.04                                                     | 3.05                                                     | 104.00                       | 6.99 | 9.00             | 0                                |
| Jul.-29     | 0.05                                                     | 1.18                                                     | 253.70                       | 6.54 | 0.60             | 7                                |
| Jul.-31     | 0.04                                                     | 2.57                                                     | 63.79                        | 5.70 | 2.40             | 1                                |
| Aug.-2      | 0.02                                                     | 1.09                                                     | 48.87                        | 6.53 | 10.00            | 0                                |
| Aug.-3      | 1.07                                                     | 1.27                                                     | 36.53                        | 6.54 | 0.80             | 0                                |
| Aug.-10     | 0.86                                                     | 1.88                                                     | 103.32                       | 7.24 | 2.20             | 5                                |
| Aug.-11     | 1.16                                                     | 1.09                                                     | 47.90                        | 6.76 | 4.40             | 0                                |
| Aug.-13     | 0.77                                                     | 1.53                                                     | 68.17                        | 6.72 | 0.60             | 0                                |
| Aug.-25     | 1.25                                                     | 1.74                                                     | 115.37                       | 6.80 | 4.20             | 0                                |
| Aug.-30     | 0.14                                                     | 0.96                                                     | 97.94                        | 6.86 | 0.60             | 1                                |
| Sep.-4      | 0.32                                                     | 0.75                                                     | 15.45                        | 6.29 | 13.00            | 0                                |
| Sep.-8      | 0.39                                                     | 0.65                                                     | 19.13                        | 6.04 | 5.40             | 3                                |
| Sep.-10     | 0.58                                                     | 0.79                                                     | 10.70                        | 6.17 | 13.60            | 0                                |
| Sep.-22     | 0.54                                                     | 0.91                                                     | 44.65                        | 6.74 | 0.50             | 2                                |
| Sep.-27     | 0.63                                                     | 0.86                                                     | 36.70                        | 6.64 | 0.50             | 4                                |

385

390

**Table 2.** Summary of rainfall, temperature, wind speed, monthly concentrations and fluxes of DOC and DIC in rainwater during July to September.

| Month     | Rainfall (mm) | Sampled rainfall (mm) | VWM concentration (mg C L <sup>-1</sup> ) |       | Deposition flux (mg C m <sup>-2</sup> ) |        | Temperature (°C) | Wind speed (m s <sup>-1</sup> ) |
|-----------|---------------|-----------------------|-------------------------------------------|-------|-----------------------------------------|--------|------------------|---------------------------------|
|           |               |                       | DIC                                       | DOC   | DIC                                     | DOC    |                  |                                 |
| July      | 22.0          | 15.8                  | 4.30                                      | 24.62 | 67.94                                   | 389.00 | 22.2             | 0.40                            |
| August    | 36.6          | 22.4                  | 10.52                                     | 3.58  | 235.65                                  | 80.19  | 22.6             | 0.37                            |
| September | 44.0          | 33.0                  | 5.89                                      | 1.01  | 194.37                                  | 33.33  | 17.5             | 0.37                            |

395 **Table 3.** Correlation coefficients between DOC, DIC, NH<sub>4</sub><sup>+</sup>-N, NO<sub>3</sub><sup>-</sup>-N, TDS, and pH (n=48).

| DOC                             | DOC | NH <sub>4</sub> <sup>+</sup> -N | NO <sub>3</sub> <sup>-</sup> -N | TDS    | pH    |
|---------------------------------|-----|---------------------------------|---------------------------------|--------|-------|
| DOC                             | -   | -0.67**                         | 0.76**                          | 0.66** | -0.09 |
| NH <sub>4</sub> <sup>+</sup> -N | -   | -                               | -0.44                           | -0.18  | 0.33  |
| NO <sub>3</sub> <sup>-</sup> -N | -   | -                               | -                               | 0.39*  | -0.11 |
| TDS                             | -   | -                               | -                               | -      | 0.37* |

  

| DIC                             | DIC | NH <sub>4</sub> <sup>+</sup> -N | NO <sub>3</sub> <sup>-</sup> -N | TDS   | pH     |
|---------------------------------|-----|---------------------------------|---------------------------------|-------|--------|
| DIC                             | -   | 0.69**                          | -0.33                           | 0.16  | 0.62** |
| NH <sub>4</sub> <sup>+</sup> -N | -   | -                               | -0.44*                          | -0.18 | 0.33   |
| NO <sub>3</sub> <sup>-</sup> -N | -   | -                               | -                               | 0.39* | -0.11  |
| TDS                             | -   | -                               | -                               | -     | 0.37*  |

Note: \*\* (P<0.01), \* (P<0.05)

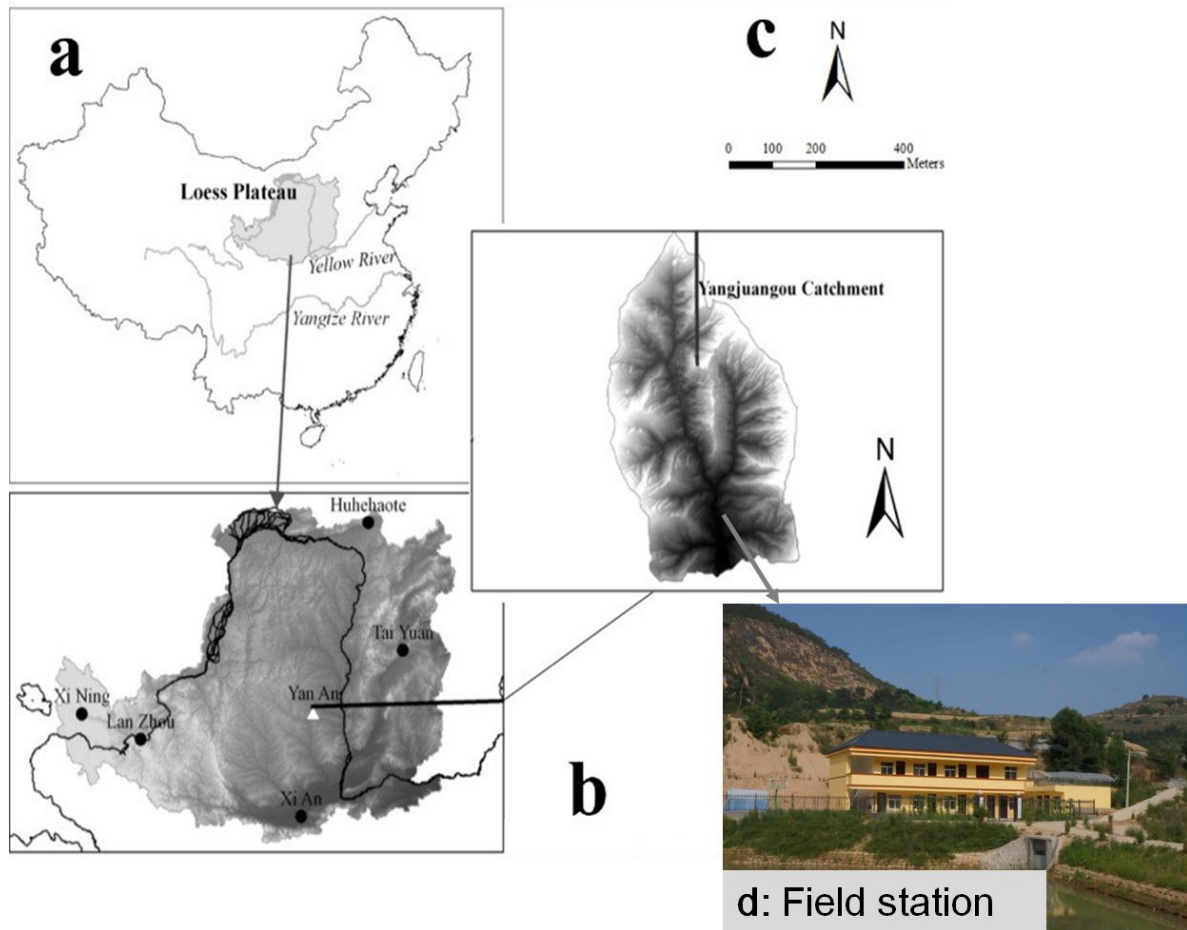

**Figure 1** Geographic location of the Yangjuangou catchment (c) in the LPR (b) of China (a) and the field station (d).

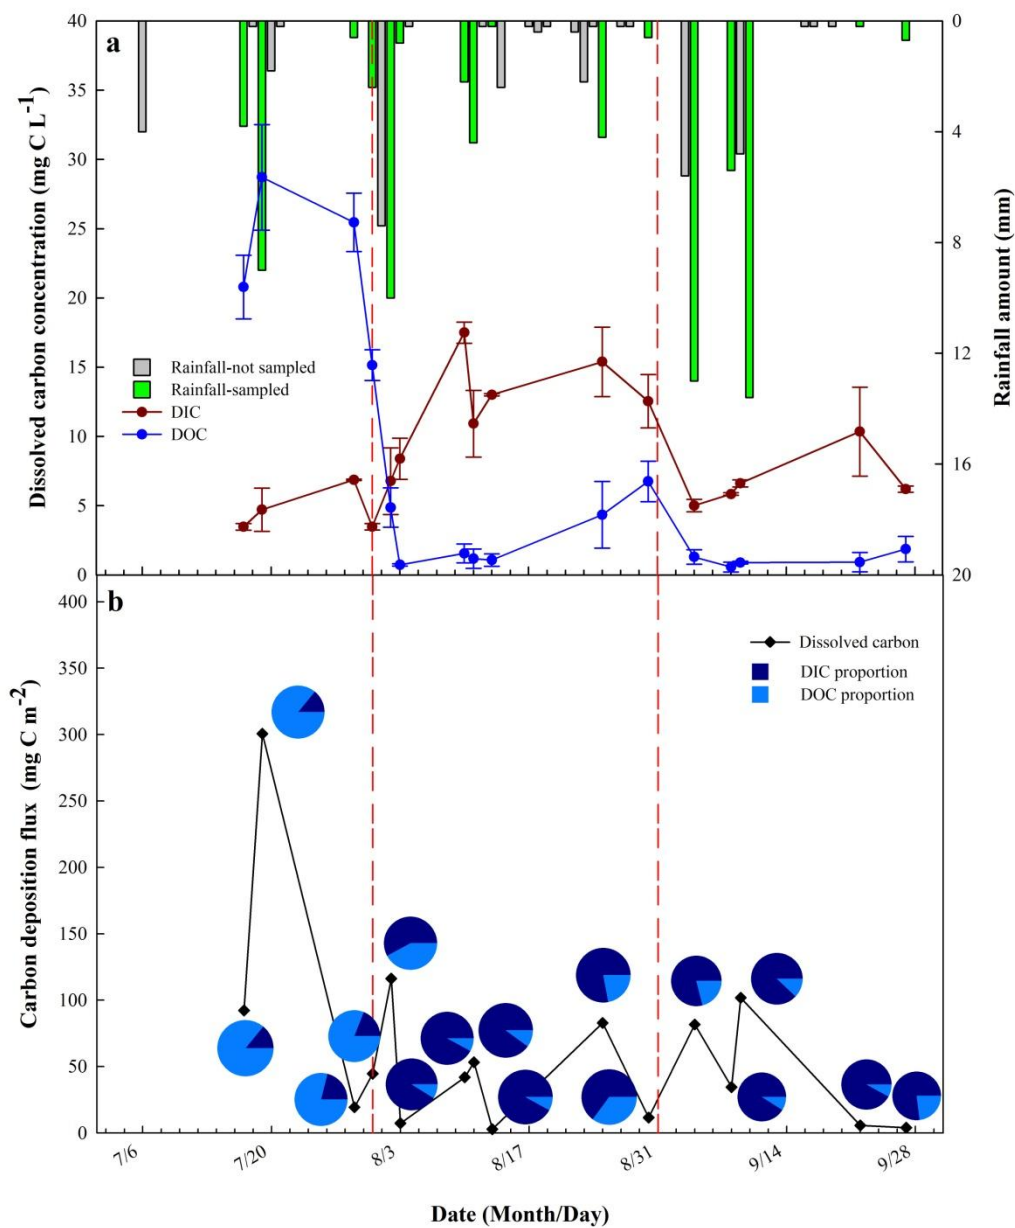

405

**Figure 2** The dissolved carbon concentrations (a), deposition fluxes and the proportions of DOC and DIC (b) in individual rainfall events during July to September.



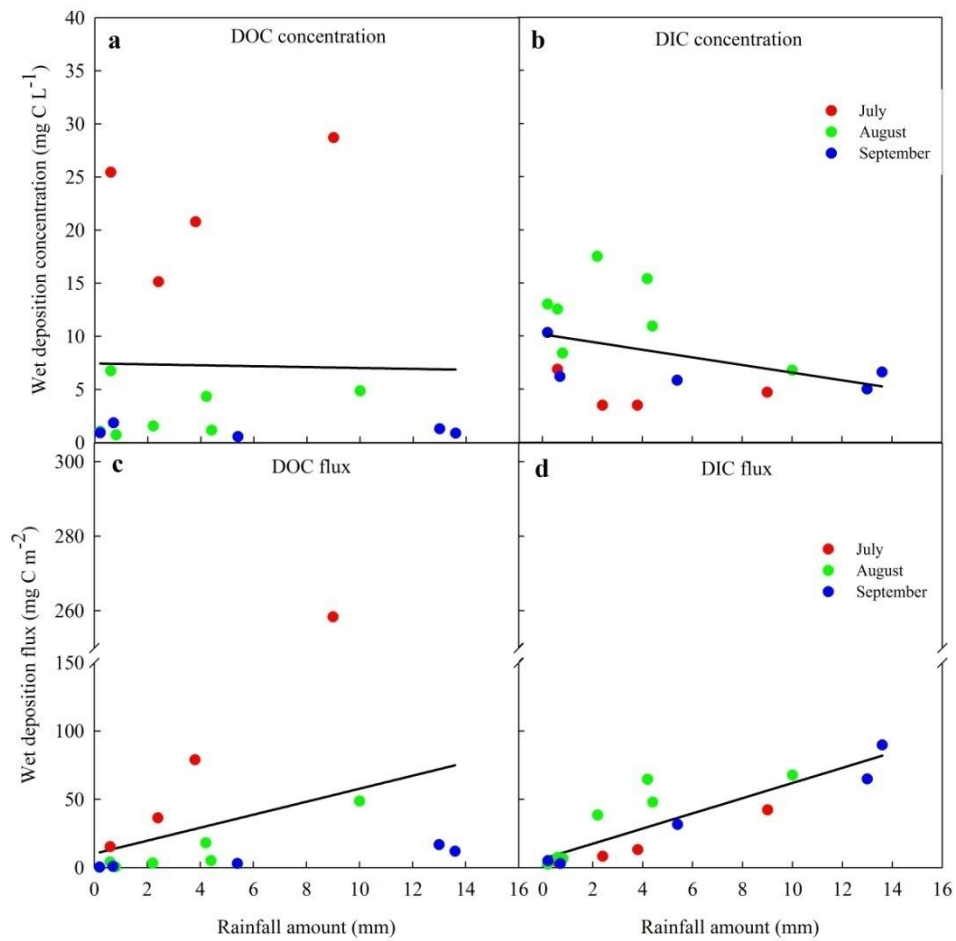

410 **Figure 3** Relationships between measured parameters and rainfall amounts in a single rainfall event during July to September: (a) DOC concentration, (b) DIC concentration, (c) DOC flux and (d) DIC flux.

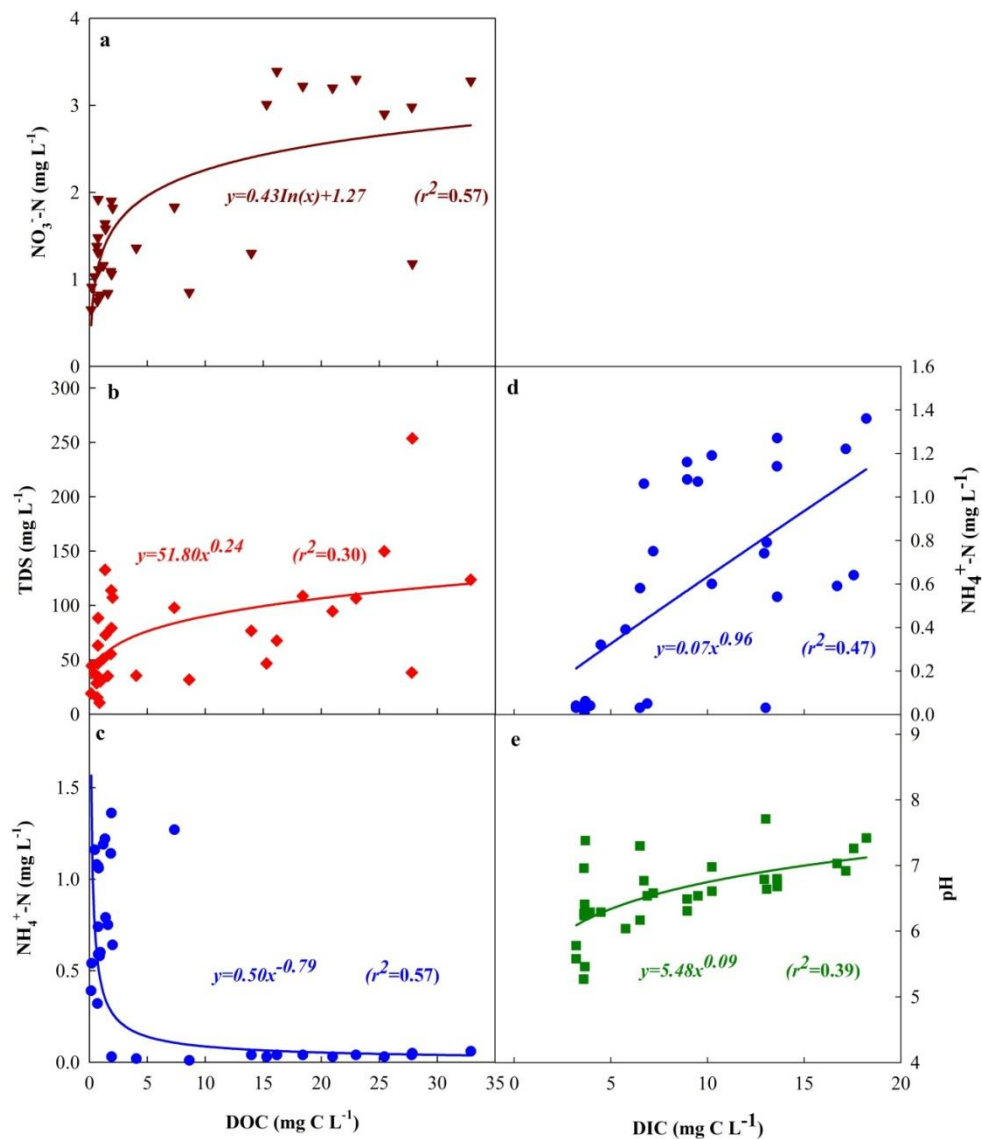

**Figure 4** Significant correlations between DOC concentrations and various rainwater variables: (a) NO<sub>3</sub><sup>-</sup>-N, (b) TDS, and (c) NH<sub>4</sub><sup>+</sup>-N in the rainfall event samples collected during July-September. In addition, correlations between DIC concentrations with the variables: (d) NH<sub>4</sub><sup>+</sup>-N and (e) pH, are also demonstrated accordingly.

415
